# Supplementary material
Source: MDPI journal article supplement (https://www.mdpi.com/2077-1312/10/6/816)
Supplement: s1 [file s1]

**Table S1.** Average concentrations of potential toxic elements in sediment samples collected from Gamasa estuary and littoral shelf (1<sup>st</sup> year)

| S.ID                     |     | Chemical components (ppm) (1 <sup>st</sup> year) |       |      |      |       |      |     |     |      |      |      |      |     |     |      |     |      |
|--------------------------|-----|--------------------------------------------------|-------|------|------|-------|------|-----|-----|------|------|------|------|-----|-----|------|-----|------|
|                          |     | Al                                               | Fe    | Ti   | Mn   | Mg    | P    | V   | Cr  | Co   | Ni   | Cu   | Zn   | Sr  | Ba  | Pb   | Zr  | Ce   |
| Estuary Sediments        | E1  | 37300                                            | 25200 | 5900 | 5002 | 14050 | 1305 | 118 | 155 | 23.0 | 31.0 | 29.0 | 126  | 191 | 460 | 29.0 | 149 | 17.0 |
|                          | E2  | 36850                                            | 23600 | 5100 | 3126 | 13900 | 1310 | 122 | 159 | 24.0 | 28.0 | 33.0 | 124  | 196 | 501 | 30.0 | 159 | 20.0 |
|                          | E3  | 38200                                            | 23950 | 6010 | 3500 | 14150 | 1320 | 124 | 152 | 22.0 | 26.0 | 31.0 | 129  | 201 | 366 | 25.0 | 210 | 22.0 |
|                          | E4  | 39210                                            | 24600 | 4800 | 5100 | 14200 | 1290 | 133 | 162 | 25.0 | 33.0 | 32.0 | 132  | 195 | 490 | 28.0 | 163 | 18.0 |
|                          | E5  | 38600                                            | 23400 | 5300 | 4800 | 14100 | 1300 | 115 | 149 | 22.0 | 26.0 | 27.0 | 121  | 206 | 485 | 21.0 | 160 | 19.0 |
|                          | E6  | 67200                                            | 41900 | 7100 | 3100 | 15500 | 1400 | 130 | 130 | 13.0 | 26.0 | 19.0 | 101  | 249 | 375 | 7.00 | 258 | 41.0 |
|                          | E7  | 50500                                            | 23400 | 4700 | 2400 | 10100 | 1600 | 135 | 122 | 14.0 | 22.0 | 23.0 | 97.0 | 210 | 266 | 5.00 | 184 | 34.0 |
|                          | E8  | 77100                                            | 51200 | 8600 | 2600 | 19700 | 1600 | 163 | 121 | 27.0 | 38.0 | 31.0 | 108  | 262 | 425 | 6.00 | 196 | 42.0 |
|                          | E9  | 60200                                            | 46150 | 6934 | 3400 | 17200 | 1500 | 135 | 118 | 22.0 | 33.0 | 27.0 | 99.2 | 259 | 350 | 5.00 | 188 | 38.0 |
|                          | E10 | 50100                                            | 40700 | 5422 | 4000 | 15000 | 1200 | 120 | 115 | 15.0 | 29.5 | 22.0 | 97.5 | 263 | 275 | 7.00 | 179 | 35.0 |
| Littoral shelf sediments | L1  | 44200                                            | 31400 | 7400 | 1800 | 18700 | 600  | 201 | 217 | 18.0 | 35.0 | 14.0 | 59.0 | 242 | 291 | 5.00 | 346 | 67.0 |
|                          | L2  | 42400                                            | 44900 | 7400 | 2500 | 18100 | 730  | 219 | 278 | 24.0 | 39.0 | 12.0 | 54.0 | 273 | 227 | 5.00 | 375 | 72.0 |
|                          | L3  | 42000                                            | 43200 | 7900 | 2600 | 21000 | 790  | 250 | 228 | 19.0 | 31.0 | 16.0 | 42.0 | 261 | 202 | 2.00 | 383 | 58.0 |
|                          | L4  | 42600                                            | 44000 | 7900 | 2100 | 20100 | 660  | 172 | 290 | 23.0 | 32.0 | 11.0 | 36.0 | 287 | 280 | 6.00 | 240 | 23.0 |
|                          | L5  | 45800                                            | 42100 | 7600 | 1900 | 19500 | 660  | 162 | 142 | 24.0 | 34.0 | 13.0 | 40.0 | 294 | 260 | 5.00 | 241 | 26.0 |
|                          | L6  | 49000                                            | 41700 | 7700 | 2800 | 19100 | 790  | 210 | 248 | 21.0 | 28.0 | 11.0 | 47.0 | 256 | 224 | 5.00 | 338 | 66.0 |
|                          | L7  | 44700                                            | 33150 | 7100 | 1950 | 19900 | 630  | 212 | 250 | 22.0 | 34.0 | 13.0 | 51.2 | 260 | 301 | 6.00 | 340 | 65.0 |
|                          | L8  | 47200                                            | 42500 | 7450 | 2400 | 19300 | 710  | 193 | 205 | 23.0 | 31.0 | 12.0 | 43.5 | 275 | 240 | 5.00 | 292 | 44.0 |

**Table S2.** Average concentrations of potential toxic elements in sediment samples collected from Gamasa estuary and littoral shelf (2<sup>nd</sup> year)

| S.ID                     |     | Chemical components (ppm) (2 <sup>nd</sup> year) |       |      |      |       |      |     |     |      |      |      |      |     |     |      |     |      |
|--------------------------|-----|--------------------------------------------------|-------|------|------|-------|------|-----|-----|------|------|------|------|-----|-----|------|-----|------|
|                          |     | Al                                               | Fe    | Ti   | Mn   | Mg    | P    | V   | Cr  | Co   | Ni   | Cu   | Zn   | Sr  | Ba  | Pb   | Zr  | Ce   |
| Estuary Sediments        | E1  | 36850                                            | 26400 | 5950 | 4891 | 14653 | 1289 | 124 | 159 | 28.0 | 35.0 | 32.0 | 124  | 184 | 421 | 30.0 | 155 | 16.0 |
|                          | E2  | 37050                                            | 24650 | 5170 | 3410 | 14150 | 1362 | 119 | 149 | 26.0 | 29.0 | 31.0 | 119  | 190 | 520 | 27.0 | 139 | 18.0 |
|                          | E3  | 37900                                            | 24700 | 6194 | 4010 | 14361 | 1374 | 134 | 154 | 25.0 | 22.0 | 34.0 | 117  | 208 | 401 | 21.0 | 178 | 24.0 |
|                          | E4  | 38800                                            | 23900 | 4550 | 5035 | 14566 | 1306 | 121 | 156 | 21.0 | 31.0 | 33.0 | 129  | 198 | 456 | 29.0 | 170 | 21.0 |
|                          | E5  | 39250                                            | 24100 | 5015 | 4992 | 14185 | 1350 | 122 | 152 | 35.0 | 28.0 | 30.0 | 126  | 215 | 514 | 24.0 | 274 | 22.0 |
|                          | E6  | 65800                                            | 39600 | 7150 | 2845 | 14998 | 1473 | 145 | 145 | 18.0 | 24.0 | 22.0 | 89.0 | 253 | 406 | 10.0 | 222 | 38.0 |
|                          | E7  | 52300                                            | 23900 | 5107 | 2801 | 13250 | 1540 | 131 | 129 | 11.0 | 26.0 | 26.0 | 91.0 | 199 | 217 | 7.00 | 215 | 28.0 |
|                          | E8  | 75700                                            | 51400 | 8424 | 2789 | 18340 | 1674 | 151 | 123 | 21.0 | 35.0 | 33.0 | 111  | 253 | 446 | 8.00 | 210 | 47.0 |
|                          | E9  | 59800                                            | 45800 | 7010 | 3010 | 13606 | 1150 | 137 | 113 | 17.0 | 31.0 | 24.0 | 75.0 | 261 | 315 | 6.00 | 194 | 43.0 |
|                          | E10 | 52150                                            | 40500 | 5301 | 3387 | 15070 | 954  | 116 | 101 | 11.0 | 33.0 | 20.0 | 85.0 | 270 | 255 | 8.00 | 167 | 33.0 |
| Littoral shelf sediments | L1  | 43800                                            | 33400 | 7450 | 2150 | 18900 | 630  | 194 | 199 | 22.0 | 33.0 | 15.0 | 62.0 | 250 | 276 | 6.00 | 366 | 75.0 |
|                          | L2  | 43500                                            | 44100 | 7427 | 2235 | 18600 | 691  | 207 | 237 | 26.0 | 35.0 | 10.0 | 48.0 | 260 | 247 | 6.00 | 355 | 68.0 |
|                          | L3  | 41700                                            | 44700 | 7882 | 2546 | 19430 | 710  | 234 | 246 | 20.0 | 34.0 | 14.0 | 50.0 | 275 | 189 | 3.00 | 389 | 49.0 |
|                          | L4  | 42100                                            | 43100 | 7909 | 2269 | 22869 | 681  | 193 | 273 | 25.0 | 34.0 | 13.0 | 31.0 | 276 | 268 | 5.00 | 264 | 33.0 |
|                          | L5  | 46400                                            | 42900 | 7560 | 2050 | 20302 | 650  | 182 | 172 | 21.0 | 36.0 | 12.0 | 33.0 | 300 | 244 | 6.00 | 221 | 31.0 |
|                          | L6  | 49500                                            | 42400 | 7630 | 2945 | 19724 | 806  | 219 | 256 | 22.0 | 30.0 | 9.00 | 41.0 | 265 | 238 | 5.00 | 327 | 56.0 |
|                          | L7  | 43600                                            | 32600 | 7180 | 1840 | 18621 | 665  | 201 | 222 | 17.0 | 32.0 | 14.0 | 65.0 | 241 | 293 | 6.00 | 358 | 55.0 |
|                          | L8  | 47300                                            | 39400 | 7498 | 2090 | 19955 | 776  | 206 | 170 | 19.0 | 33.0 | 8.00 | 39.0 | 292 | 258 | 4.00 | 284 | 54.0 |
